# Supplementary material for: Anti-Inflammatory Effects Exerted by 14-Methoxyalternate C from Antarctic Fungal Strain Pleosporales sp. SF-7343 via the Regulation of NF-κB and JAK2/STAT3 in HaCaT Human Keratinocytes
Source: MDPI journal article supplement (doi:10.3390/ijms232314642), 2022-11-24
Supplement: s1 [file s1]

**Table S1.**  $^1\text{H}$  and  $^{13}\text{C}$  NMR spectroscopic data of **Compound 1** ( $^1\text{H}$ : 400 MHz;  $^{13}\text{C}$ : 100

MHz).

| Position            | Compound 1                       |                     |
|---------------------|----------------------------------|---------------------|
|                     | $\delta_{\text{H}}$ ( $J$ in Hz) | $\delta_{\text{C}}$ |
| 1                   | -                                | 171.5               |
| 2                   | -                                | 108.2               |
| 3                   | -                                | 162.9               |
| 4                   | 6.20 (1H, d, $J = 2.4$ )         | 110.8               |
| 5                   | -                                | 163.6               |
| 6                   | 6.44 (1H, d, $J = 2.4$ )         | 100.4               |
| 7                   | -                                | 144.6               |
| 8                   | -                                | 134.2               |
| 9                   | 6.53 (1H, s)                     | 116.1               |
| 10                  | -                                | 145.1               |
| 11                  | -                                | 144.6               |
| 12                  | 6.84 (1H, s)                     | 116.3               |
| 13                  | -                                | 126.9               |
| 14                  | 3.95 (1H, d, $J = 11.2$ )        | 72.5                |
|                     | 3.91 (1H, d, $J = 11.2$ )        |                     |
| 1-OCH <sub>3</sub>  | 3.39 (3H, s)                     | 52.0                |
| 5-OCH <sub>3</sub>  | 3.77 (3H, s)                     | 55.8                |
| 14-OCH <sub>3</sub> | 3.07 (3H, s)                     | 57.5                |

**Table S2.**  $^1\text{H}$  and  $^{13}\text{C}$  NMR spectroscopic data of **Compound 2** ( $^1\text{H}$ : 400 MHz;  $^{13}\text{C}$ : 100 MHz).

| Position            | Compound 2                                |                     |
|---------------------|-------------------------------------------|---------------------|
|                     | $\delta_{\text{H}}$ ( $J$ in Hz)          | $\delta_{\text{C}}$ |
| 1                   | -                                         | 134.4               |
| 2                   | 6.68 (1H, s)                              | 117.4               |
| 3                   | -                                         | 145.1               |
| 4                   | -                                         | 143.6               |
| 5                   | 6.70 (1H, s)                              | 118.0               |
| 6                   | -                                         | 129.6               |
| 1'                  | -                                         | 145.1               |
| 2'                  | 6.35 (2H, d, $J = 1.6$ , overlapped H-4") | 109.8               |
| 3'                  | -                                         | 159.0               |
| 4'                  | 6.35 (2H, d, $J = 1.6$ , overlapped H-2") | 100.3               |
| 5'                  | -                                         | 161.6               |
| 6'                  | 6.31 (1H, d, $J = 2.0$ )                  | 107.2               |
| 6-CH <sub>3</sub>   | 2.11 (3H, s)                              | 19.8                |
| 3'-OCH <sub>3</sub> | 3.76 (3H, s)                              | 55.5                |

**Table S3.**  $^1\text{H}$  and  $^{13}\text{C}$  NMR spectroscopic data of **Compound 3** ( $^1\text{H}$ : 400 MHz).

| Position           | Compound 3                       |                     |
|--------------------|----------------------------------|---------------------|
|                    | $\delta_{\text{H}}$ ( $J$ in Hz) | $\delta_{\text{C}}$ |
| 1                  | -                                | -                   |
| 2                  | -                                | -                   |
| 3                  | -                                | -                   |
| 4                  | -                                | -                   |
| 4a                 | -                                | -                   |
| 5                  | 6.79 (1H, s)                     | -                   |
| 6                  | -                                | -                   |
| 6a                 | -                                | -                   |
| 7                  | 7.27 (1H, d, $J = 2.2$ )         | -                   |
| 8                  | -                                | -                   |
| 9                  | 6.54 (1H, d, $J = 2.2$ )         | -                   |
| 10                 | -                                | -                   |
| 10a                | -                                | -                   |
| 10b                | -                                | -                   |
| 6-CH <sub>3</sub>  | 2.69 (3H, s)                     | -                   |
| 4-OCH <sub>3</sub> | 3.94 (3H, s)                     | -                   |

**Table S4.**  $^1\text{H}$  and  $^{13}\text{C}$  NMR spectroscopic data of **Compound 4** ( $^1\text{H}$ : 400 MHz;  $^{13}\text{C}$ : 100 MHz).

| Position           | Compound 4                       |                     |
|--------------------|----------------------------------|---------------------|
|                    | $\delta_{\text{H}}$ ( $J$ in Hz) | $\delta_{\text{C}}$ |
| 1                  | -                                | 137.8               |
| 2                  | -                                | 98.4                |
| 3                  | -                                | 164.1               |
| 4                  | 6.61 (1H, d, $J = 2.0$ )         | 99.1                |
| 5                  | -                                | 164.7               |
| 6                  | 7.22 (1H, d, $J = 2.0$ )         | 103.3               |
| 7                  | -                                | 166.2               |
| 1'                 | -                                | 108.7               |
| 2'                 | -                                | 152.7               |
| 3'                 | 6.64 (1H, d, $J = 2.4$ )         | 101.6               |
| 4'                 | -                                | 158.8               |
| 5'                 | 6.72 (1H, d, $J = 2.4$ )         | 117.7               |
| 6'                 | -                                | 138.4               |
| 6'-CH <sub>3</sub> | 2.73 (3H, s)                     | 25.0                |
| 5-OCH <sub>3</sub> | 3.91 (3H, s)                     | 55.8                |
